1       **Identification of a small molecule that stimulates human  $\beta$ -cell proliferation**  
2       **and insulin secretion, and protects against cytotoxic stress in rat insulinoma**  
3       **cells**

4  
5

6

7       Hans E. Hohmeier<sup>1</sup>, Lu Zhang<sup>1</sup>, Brandon Taylor<sup>2</sup>, Samuel Stephens<sup>3</sup>, Peter McNamara<sup>2</sup>,  
8       Bryan Laffitte<sup>2</sup>, and Christopher B. Newgard<sup>1,4</sup>

9

10

11

12       <sup>1</sup>Sarah W. Stedman Nutrition and Metabolism and Duke Molecular Physiology Institute  
13       Departments of Pharmacology & Cancer Biology and Medicine  
14       Duke University Medical Center  
15       Durham, NC 27701

16

17

18       <sup>2</sup>Genomics Institute of the Novartis Research Foundation  
19       San Diego, CA 92121

20

21

22

23       <sup>3</sup>Department of Internal Medicine  
24       Fraternal Order of Eagles Diabetes Center  
25       University of Iowa  
26       Iowa City, IA 52240

27

28

29       **<sup>4</sup>Corresponding Author:**

30

31       Christopher B. Newgard, PhD  
32       Duke Molecular Physiology Institute  
33       300 North Duke Street  
34       Durham, NC 27701

35

36       Phone: (919) 668-6059

37       Email: [chris.newgard@duke.edu](mailto:chris.newgard@duke.edu)

38

34

## 35 **Abstract**

36 A key event in the development of both major forms of diabetes is the loss of functional  
37 pancreatic islet  $\beta$ -cell mass. Strategies aimed at enhancing  $\beta$ -cell regeneration have long  
38 been pursued, but methods for reliably inducing human  $\beta$ -cell proliferation with full retention  
39 of key functions such as glucose-stimulated insulin secretion (GSIS) are still very limited.  
40 We have previously reported that overexpression of the homeobox transcription factor  
41 Nkx6.1 stimulates  $\beta$ -cell proliferation, while also enhancing GSIS and providing protection  
42 against  $\beta$ -cell cytotoxicity through induction of the VGF prohormone. We developed an  
43 Nkx6.1 pathway screen by stably transfecting 832/13 rat insulinoma cells with a VGF  
44 promoter-luciferase reporter construct, using the resultant cell line to screen a 630,000  
45 compound chemical library. We isolated three compounds with consistent effects to  
46 stimulate human islet cell proliferation. Further studies of the most potent of these  
47 compounds, GNF-9228, revealed that it selectively activates human  $\beta$ -cell relative to  $\alpha$ -cell  
48 proliferation and has no effect on  $\delta$ -cell replication. In addition, pre-treatment, but not short  
49 term exposure of human islets to GNF-9228 enhances GSIS. GNF-9228 also protects  
50 832/13 insulinoma cells against ER stress- and inflammatory cytokine-induced cytotoxicity.  
51 In contrast to recently emergent Dyrk1a inhibitors that stimulate human islet cell  
52 proliferation, GNF-9228 does not activate NFAT translocation. These studies have led to  
53 identification of a small molecule with pleiotropic positive effects on islet biology, including  
54 stimulation of human  $\beta$ -cell proliferation and insulin secretion, and protection against  
55 multiple agents of cytotoxic stress.

56

## 57 **Introduction**

58 Both major forms of diabetes involve loss of functional  $\beta$ -cell mass, but methods for  
59 reliably inducing human  $\beta$ -cell proliferation with full retention of key functions such as glucose-  
60 stimulated insulin secretion (GSIS) are still very limited. Early approaches focused on  
61 manipulation of oncogenes or core elements of the cell replication machinery such as cyclin  
62 D1, cdk6, p16 or p57 [1-3], but such strategies either led to functional impairment or were not  
63 therapeutically tractable due to the common use of these factors for cell cycle control in all  
64 tissues in the body. More recently, several groups reported that inhibition of the tyrosine  
65 kinase Dyrk1A with harmine or other small molecules stimulates human  $\beta$ -cell replication via  
66 activation of the NFAT/calcineurin pathway [4-6]. However, the wide tissue distribution of  
67 Dyrk1a suggests that inhibitors could trigger promiscuous cellular proliferation, and indeed,

68 systemic administration of harmine activates islet  $\alpha$ -,  $\delta$ -, and ductal cell proliferation in addition  
69 to its effects on  $\beta$ -cells [5]. Therefore, additional strategies for expansion of functional human  
70  $\beta$ -cell mass are needed, including mechanisms that are orthogonal to the Dyrk1A/NFAT  
71 pathway.

72

73 Our laboratory has performed a series of studies on overexpression of the homeobox  
74 transcription factor Nkx6.1 in pancreatic islets [7-12]. Key findings include: 1)  
75 Overexpression of Nkx6.1 in rat islets results in increased  $\beta$ -cell replication accompanied by  
76 improved GSIS [7,8]; 2) Nkx6.1 induces expression of a prohormone, VGF, in both rat and  
77 human islets, which is processed to yield multiple peptides, including TLQP-21 [9]. TLQP-21  
78 protects  $\beta$ -cells from apoptotic cell death, and VGF plays an important role in insulin vesicle  
79 trafficking [9, 12]. However, VGF or its peptides do not activate  $\beta$ -cell proliferation [9]; 3)  
80 Nkx6.1 activates  $\beta$ -cell replication by a pathway that is additive to and distinct from the  
81 pathway activated by overexpression of Pdx-1 [10,11]. Importantly, overexpression of Nkx6.1  
82 under control of the constitutive CMV promoter (causing expression in all islet cells)  
83 selectively stimulates proliferation of  $\beta$ -cells [8, 11], whereas overexpression of Pdx-1 via the  
84 same vector stimulates proliferation of both  $\alpha$ - and  $\beta$ -cells via a secreted factor or factors [11,  
85 13]. These results support the idea that Nkx6.1 activates a replication pathway with intrinsic  $\beta$ -  
86 cell specificity.

87

88 Based on these findings, we stably transfected the INS-1-derived 832/13 rat insulinoma cell  
89 line [14] with a plasmid containing the VGF promoter driving expression of luciferase, and  
90 used the resultant cell line to screen a 630,000 compound small molecule library. Given the  
91 positive impact of Nkx6.1 and VGF in islet cells [7-12], the screen was designed with a VGF-  
92 luc construct to capture small molecules that activate Nkx6.1 expression, stabilize or activate

93 Nkx6.1 function, or serve as direct inducers of VGF. We ultimately isolated three compounds  
94 with robust and consistent effects to stimulate human islet cell proliferation. Further studies of  
95 the most potent of these compounds, GNF-9228, revealed that it selectively activates human  
96  $\beta$ -cell relative to  $\alpha$ - or  $\delta$ -cell proliferation. Moreover, pre-treatment of human islets with GNF-  
97 9228 enhances insulin secretion. GNF-9228 also protects a rat  $\beta$ -cell line, INS-1 832/13,  
98 against cytotoxicity. Finally, GNF-9228 does not activate NFAT translocation, suggesting a  
99 mechanism of action distinct from Dyrk1a inhibitors.

100

## 102 **Materials and methods**

103 **Cell culture and reagents.** INS-1-derived 832/13 rat insulinoma cells were cultured as  
104 previously described [14]. Human islets were obtained from the Integrated Islet Distribution  
105 Program (IIDP) or from the University of Alberta Human Islet Core. Viability of human islets  
106 was tested by staining with propidium iodide as described in the IIDP SOP (<http://iidp.coh.org>),  
107 and were used only if viability was >75%. Human islets were cultured in RPMI-1640  
108 (Invitrogen 11879) supplemented with 5.5 mmol/L glucose, 10% FCS (Sigma), 100 U/ml  
109 penicillin, 100 µg/ml streptomycin and 250 ng/ml amphotericin B (Gibco #15240). An  
110 adenovirus vector containing the cDNA for NFATc1 was obtained from Welgen, and stock  
111 solutions were diluted 1:8000 when added to Ins1 cells in 384 well plates.

112 **Generation of the 832/13-VGF-Luc Cell Line.** Primers GAA GAT CTA TGG TCG AGGGCT  
113 GGC G and GGG GTA CCT GAC CCC CCT TCT CAG C corresponding to +77 to -2022 of  
114 the rat *VGF* promoter were used to amplify rat genomic DNA. The amplified PCR product  
115 was digested with BglII and KpnI for ligation upstream of a luciferase reporter gene that is  
116 contained in vector pGL4.21 (Promega). 832/13 cells were transfected with the resultant VGF  
117 promoter-luciferase reporter plasmid by electroporation and selected with puromycin [14] to  
118 yield stably transfected 832/13-VGF-Luc cells.

119 **Gene expression analyses.** RT-PCR was used to measure the following transcripts, using  
120 the indicated Taqman probes: Rat *Nkx6.1* : Rn01450076\_m1, human *NKX6.1*:  
121 Hs00232355\_m1, human *VGF*: Hs00705044\_s1, human *MYC*: Hs00153408\_m1. Gene  
122 expression was normalized against expression of cyclophilin A: human *PPIA*:  
123 Hs04194521\_s1, rat *Ppia*: Rn00690933\_m1.

124 **Use of 832/13-VGF-Luc cell line for small molecule high-throughput screen.** High  
125 throughput screening was performed using 832/13-VGF-Luc cells. Briefly, 2,000 cells per well  
126 were plated in 5 µL RPMI in 1536-well plates. Individual molecules from a 630,000 compound

127 chemical library assembled at the Genomics Institute of the Novartis Foundation (GNF) were  
128 added to single wells at a final concentration of 10  $\mu$ M and incubated for 6 h. 2  $\mu$ L of Bright  
129 Glo (Promega) was added to each well and luciferase-generated luminescence was  
130 measured with a plate reader (GNF Systems). Data were normalized to assay plate median  
131 and hits were called based on a robust deviation of 3. Hits in the primary screen were  
132 counterscreened against Ins1 cells stably transfected with a cyclic AMP response element  
133 (CRE)-luciferase reporter or HEK293T cells containing a PLTP-DR4B luciferase construct  
134 (pGL4.24 luciferase vector) [15]. The three compounds with human islet proliferative activity,  
135 GNF-9228, GNF-4088, GNF-1346 and the Dyrk1a inhibitor GNF-4877 [4] were dissolved in  
136 DMSO.

137 **Islet cell proliferation measured by EdU incorporation.** For EdU labeling, a 1:1,000 dilution  
138 of EdU-labeling reagent (Invitrogen) was added to islet culture medium during the last 18h  
139 (Figure 3) or 72h (Figure 7) of cell culture. Islets were harvested and processed for  
140 immunofluorescence analyses as described previously [13]. Images were captured and  
141 analyzed with the Cellomics CX5 High Content (HC) cell based imaging system (Thermo) as  
142 described [13].

143 **Glucose-Stimulated Insulin Secretion.** Human islets were pretreated with 10  $\mu$ M GNF-9228  
144 or DMSO for 72h. Insulin secretion was measured by static incubation of 30 islets in 4  
145 replicate groups as previously described [9]. Secreted insulin was measured by ELISA (80-  
146 INSMR-CH10, ALPCO) and normalized to insulin content [9]. To measure the acute effects of  
147 GNF-9228, some batches of human islets were treated with GNF-9228 during the secretion  
148 assay only (no pre-treatment).

149 **Viability and cell toxicity assays.** 832/13 cells were seeded in 96-well tissue culture dishes.  
150 To induce cell toxicity, cells were treated with 200-500 nM thapsigargin or with a mixture of 1

151 ng/ml rat IL-1 $\beta$  (Sigma) + 100 U/ml rat IFN- $\gamma$  (Thermo) . Cell viability was measured using the  
152 CellTiter96 assay (Promega), or for apoptosis by measurement of caspase-3 cleavage [16].

153 **Pharmacokinetics of GNF-9228 in mice.** The following studies were approved by the Duke  
154 University Institutional Animal Care and Use Committee (IACUC). We delivered 30 mg/kg of  
155 GNF-9228, GNF-1346, or GNF-4088 suspended in DMSO by intraperitoneal injection into  
156 normal C57BL6 mice and measured levels of the compounds in the blood by mass  
157 spectrometry over the following 24 hours. Six C57BL6 mice also received daily injections of 30  
158 mg/kg GNF-9228 for one week, while 6 control mice received injections of DMSO. For all  
159 mice, BrdU was added to the drinking water at a concentration of 0.8 mg/ml. 24 h after the  
160 final GNF-9228 or DMSO injection, the mice were euthanized and pancreata were dissected,  
161 fixed in neutral-buffered formalin, and paraffin embedded. Slides were incubated overnight  
162 with guinea pig anti-insulin (Dako) and mouse anti-BrdU (Dako) antibodies, followed by  
163 detection with an AlexaFluor 488 conjugated goat anti-guinea pig and AlexaFluor 555  
164 conjugated goat anti-mouse secondary antibody (Invitrogen), and counterstaining with DAPI.  
165 Images were captured and analyzed using OpenLab software. A minimum of 4 slides per  
166 pancreas spaced 75-100  $\mu$ m apart were analyzed, comprising a total of approximately 10,000  
167 cells per condition.

#### 168 **Statistical Analyses.**

169 Data are presented as means + standard errors of mean (SEM) and graphed using GraphPad  
170 Prism 8.1 software. The differences between groups were compared using a Student's t-test  
171 and values of P < 0.05 were considered significant.

172

173

174

176 **Results**

177

178 **Cell-based screen for inducers of Nkx6.1 and VGF.** We engineered a rat insulinoma (INS-  
179 1)-derived cell line, 832/13 [14], by stable transfection with a rat VGF promoter-luc reporter to  
180 generate a new cell line, 832/13-VGF-luc. 832/13-VGF-luc cells were screened with the  
181 630,000 compound small molecule library assembled at the Genomics Institute of the Novartis  
182 Research Foundation (GNF). A total of 4437 compounds caused significant (standard  
183 deviation of three from the mean) stimulation of luciferase expression in the screen. These  
184 hits were counterscreened in HEK-293 cells stably transfected with an unrelated promoter-  
185 luciferase construct (PLTP-luc), or Ins1 cells transfected with a CREB-luciferase construct.  
186 The counterscreening protocol yielded 41 compounds with activity profiles similar to those  
187 shown for compounds GNF-9228 and GNF-7169, featuring robust, dose-dependent activation  
188 of the VGF-luc construct, with no activation of PLTP-luc (**Fig 1**). Since the VGF promoter  
189 contains a consensus cyclic AMP response element-binding protein (CREB) binding  
190 sequence [17], compounds were also counterscreened against a CREB-luc reporter.  
191 Compound GNF-7169 had no activity against the CREB-luc construct, whereas GNF-9228  
192 had a weak activating effect (**Fig 1**).

193

194 **Fig 1. Representative “Hits” from small molecule screen.** A high throughput screen was  
195 performed with 832/13 cells stably expressing a VGF promoter-luciferase reporter construct  
196 (832/13-VGF-luc cells). Hits were called based on a robust deviation of 3 from the mean. Hits  
197 were then confirmed in 8 point dose response studies in 832/13-VGF-Luc cells (VGF) and  
198 counter-screened against HEK-293T PLTP-Luc (PLTP) and Ins1 CRE-Luc (CRE) cell lines.  
199 Dose response curves for two representative hits, GNF-7169 and GNF-9228, are shown.

200

201 We studied the effects of the 41 lead compounds on islet cell proliferation, GSIS, and  
202 protection against apoptotic cell stress. Through this, we isolated three compounds (GNF-



203 9228, GNF-1346, and GNF-4088) with robust and consistent effects to stimulate human islet  
204 cell proliferation. GNF-9228 and GNF-4088 are variants of a common chemotype, whereas  
205 GNF-1346 has a distinct structure (**Fig 2A**). Consistent with the design of the screen, both  
206 GNF-9228 and GNF-1346 caused potent induction of Nkx6.1 mRNA expression in 832/13  
207 cells (**Fig 2B**). However, when tested on human islets, the two compounds caused a non-  
208 significant trend to increase Nkx6.1 mRNA, and had no effect on expression of VGF or the c-  
209 myc oncogene, a known activator of islet cell replication (**Figs 2C, 2D, 2E**) [18]. GNF-9228  
210 was found to be the most potent of the three compounds for stimulation of human islet cell  
211 proliferation, and studies that follow therefore focus on the activities of this molecule.

212

213 **Fig 2. Structures of compounds GNF-9228, GNF-4088 and GNF-1346 and their effects**  
214 **on possible target genes.** **A.** Structures of three compounds with human islet cell  
215 proliferative activity isolated from our 832/13-VGF-luc screen are shown. GNF-9228 and  
216 GNF-4088 have very similar structures, whereas GNF-1346 is distinct. **B. RT-PCR**  
217 measurement of Nkx6.1 levels in 832/13 cells following exposure to 10  $\mu$ M GNF-1346, 10  $\mu$ M  
218 GNF-9228 or vehicle (DMSO) for 6 hours. Five human islet samples from different donors  
219 were treated with 10  $\mu$ M GNF-9228, 10  $\mu$ M GNF-1346 or DMSO for 6 hours, followed by  
220 measurement of the following mRNAs by RT-PCR: **C.** Nkx6.1; **D.** VGF; **E.** c-myc. Data in  
221 panels B-E are expressed as fold-increase in 832/13 cells or islets treated with GNF-1346 or  
222 GNF-9228 relative to DMSO-treated, with n = 6 for 832/13 cells and n = 5 for human islet  
223 experiments (\*\* p < 0.0001 comparing GNF-9228 or GNF-1346-treated cells to DMSO-treated  
224 cells in panel B).

225

226 **GNF-9228 selectively stimulates proliferation of human islet  $\beta$ -cells.** Human islet cell  
227 replication was measured by EdU incorporation, and specific islet cell types were identified by  
228 insulin, glucagon, or somatostatin co-staining. A total of 7 human islet aliquots, each from a  
229 different donor, were tested for the effect of 10  $\mu$ M GNF9228 on islet  $\beta$ -cell and  $\alpha$ -cell  
230 replication. The dose of GNF-9228 was chosen as the maximally active dose based on

231 titration studies in rat islets (**S1 Fig**). The individual human islet preps had substantial variation  
232 in the percent of  $\beta$ - and  $\alpha$ -cells that were positive for EdU staining under control (DMSO-  
233 treated) conditions, including zero values for two of the  $\alpha$ -cell experiments. The data are  
234 therefore presented as fold-response to normalize the differences in basal values. All 7  
235 human islet preps exhibited an increase in  $\beta$ -cell and total cell EdU incorporation in response  
236 to GNF-9228 relative to DMSO treatment, with statistically significant average responses of 6-  
237 fold in total islet cells, and 7.3-fold in  $\beta$ -cells (**Fig 3**). The 5 human islet samples with  
238 detectable  $\alpha$ -cell EdU staining at baseline all increased EdU incorporation into  $\alpha$ -cells in  
239 response to GNF-9228, but here the average was 4.3-fold, and of marginal statistical  
240 significance ( $p=0.06$ ). Additional information about the number of cells assayed and the  
241 percentages of EdU-positive islet cells,  $\beta$ -cells, and  $\alpha$ -cells, is provided in (**S1 Table**). In  
242 addition, in a subset of human islet preparations with detectable co-staining of EdU and  
243 somatostatin under basal conditions, GNF-9228 caused no increase in EdU incorporation into  
244  $\delta$ -cells (**S2 Table**). Taken together, these data suggest that under the conditions used in  
245 these experiments (EdU exposure of 18 hours) GNF-9228 activates EdU incorporation into  
246 human islet cells in a  $\beta$ -cell selective fashion, with a marginal effect on  $\alpha$ -cells and no  
247 detectable effect on  $\delta$ -cells.

248

249 **Fig 3. GNF-9228 selectively stimulates human Islet  $\beta$ -cell replication.** Intact human islets  
250 were cultured for 72 h in the presence of 10  $\mu$ M GNF-9228 or DMSO (vehicle control). EdU  
251 was added for the last 18 h of culture. Islets were dispersed, stained for EdU incorporation  
252 and treated with antibodies against EdU, insulin or glucagon, and immunofluorescent signals  
253 were detected and quantified with a Thermo Scientific Cellomics CX5- High Content (HC) cell  
254 imaging system. **A.** Low magnification image showing increase in islet cell EdU incorporation  
255 (yellow) in GNF-9228 versus DMSO-treated cells, with cells visualized by DAPI staining  
256 (blue). **B.** High magnification image showing two Edu (orange nuclei), insulin (green  
257 cytoplasm) co-positive cells and one Edu (orange nucleus), glucagon (blue cytoplasm) co-

258 positive cell. **C.** Bar graph summary of data expressed as the fold-increase in EdU positive  
259 cells across all islet cells assayed (left), in  $\beta$ -cells (EdU and insulin co-positive cells (center),  
260 and  $\alpha$ -cells (EdU and glucagon positive cells (right), representing experiments performed on 7  
261 independent human islet aliquots (total cells and  $\beta$ -cells) and 5 human islet samples ( $\alpha$ -cells),  
262 expressed as mean  $\pm$  S.E.M. (\*  $p < 0.05$ ). See S1 Table for further details.

263

264 **GNF-9228 stimulates insulin secretion in rat and human islets.** We next tested the  
265 impact of GNF-9228 on insulin secretion. Acute (less than 24 hour exposure) of islets to  
266 GNF-9228 had no impact on GSIS (**S1 Fig**). However, pre-exposure of human islets to 5 or 10  
267  $\mu$ M GNF-9228 for 72 hours caused a 75-140% increase in insulin secretion in the presence of  
268 stimulatory (16.7 mM) glucose compared to human islets treated with DMSO (**Fig 4**). Insulin  
269 secretion was normalized to insulin content in these experiments, which showed a non-  
270 significant trend to decrease in response to GNF-9228 treatment (human islets treated for 72  
271 h with 5  $\mu$ M or 10  $\mu$ M GNF-9228 had  $86 \pm 9.1\%$  and  $83 \pm 12.9\%$  of the insulin content  
272 measured in DMSO-treated islets, respectively). This non-significant change in insulin content  
273 does not explain the enhanced insulin secretion elicited by GNF-9228 treatment. We also note  
274 that insulin secretion at basal (2.8 mM) glucose levels increased significantly at 5  $\mu$ M, and  
275 showed a non-significant trend to increase at 10  $\mu$ M GNF-9228 (**Fig 4**). This increase in basal  
276 insulin secretion caused the stimulation index (insulin secreted at 16.7 mM relative to 2.5 mM  
277 glucose) to be essentially identical in the GNF-9228 and DMSO-treated islets. Nevertheless,  
278 pretreatment with, but not acute exposure to GNF-9228 enhances insulin secretion at  
279 stimulatory glucose in human islets.

280

281 **Fig 4. Pre-treatment of human islets with GNF-9228 enhances insulin secretion.** Intact  
282 human islets were pre-treated for 72 h with 5 or 10  $\mu$ M GNF-9228 or DMSO (vehicle control).  
283 Glucose-stimulated insulin secretion was then measured by static incubation in secretion  
284 buffer containing 2.5 mM glucose followed by 16.7 mM glucose for 1 h each. Secreted insulin  
285 is reported as a percentage of insulin content. Data represent the mean  $\pm$  S.E.M. from 4

286 independent human islet preparations, each assayed in quadruplicate. (#  $p < 0.005$  compared  
287 to DMSO treated cells at 16.7 mM glucose; §  $p < 0.01$  compared to DMSO treated cells at 2.5  
288 mM glucose).

289

290 **GNF-9228 protects 832/13 cells from ER stress and cytokine-induced cytotoxicity.** To  
291 test GNF-9228 for its potential pro-survival effects, 832/13 cells were exposed to 500 nM  
292 thapsigargin (TG) for 6 hours in the presence and absence of 10  $\mu$ M GNF-9228. Co-treatment  
293 of 832/13 cells with TG + GNF-9228 resulted in a clear reduction in cleaved caspase-3  
294 compared to control cells incubated with TG + DMSO (**Figs 5A and 5B**). In another set of  
295 experiments, 832/13 cells were pretreated with GNF-9228 or vehicle for 24 h followed by 24 h  
296 exposure to 200 or 250 nM thapsigargin (TG) or a mixture of the cytotoxic cytokines IL-1 $\beta$  and  
297  $\gamma$ -IFN in the presence or absence of GNF-9228 (**Fig 5C**). In these experiments, cell viability  
298 was measured with the mitochondrial activity dye MTS. Exposure to 250 nM TG + DMSO  
299 decreased cell viability by 67%, whereas cells treated with TG + GNF-9228 suffered only a  
300 31% reduction in viability. Similarly, exposure of vehicle-treated 832/13 cells to the  
301 inflammatory cytokines IL-1 $\beta$  +  $\gamma$ -IFN caused a 67% reduction in viability, whereas GNF-9228  
302 limited the effect to a 40% reduction. Thus, GNF-9228 exhibits anti-apoptotic and pro-cell  
303 survival effects in the INS-1-derived 832/13 cell line. Note that we chose to perform our  
304 experiments in these cells based on our finding that they are far more sensitive to activation of  
305 apoptosis than primary islet cells [16], suggesting that the cell line provides the most stringent  
306 model for demonstrating cytoprotective effects of GNF-9228 at this stage of the work.

307

308 **Figure 5. GNF-9228 protects 832/13 cells from ER stress and cytokine-induced**  
309 **cytotoxicity. A.** 832/13 cells were treated with 500 nM thapsigargin (TG) for 6h in the  
310 presence and absence of 10  $\mu$ M GNF-9228. A representative immunoblot of cleaved  
311 caspase-3 is shown. **B.** Bar graph summary of 4 independent densitometric measurements  
312 of cleaved caspase-3 in 832/13 cells exposed to 500 nM TG  $\pm$  10  $\mu$ M GNF-9228 or DMSO for

313 6 hours. **C.** 832/13 cells were pre-treated with 10  $\mu$ M GNF-9228 or DMSO for 24 h followed by  
314 24 h incubation with two doses of thapsigargin (TG) or a mixture of IL-1 $\beta$  and  $\gamma$ -IFN. Cell  
315 viability was measured by MTS assay. ( $\&$ p < 0.001; \* p < 0.05; \$ p < 0.01, comparing GNF-  
316 9228 to DMSO- treated cells).

317

318 **Comparison of the effects of GNF-9228 and the Dyrk1A inhibitor GNF-4877.** To test  
319 whether GNF-9228 activates islet cell proliferation by a mechanism similar to that reported for  
320 Dyrk1a inhibitors [4-6], we compared the effects of GNF-9228 and GNF-1346 to those of  
321 GNF-4877 [4] and harmine [5] on NFAT nuclear translocation. Treatment with increasing  
322 doses of these agents demonstrated clear activation of NFAT nuclear translocation by GNF-  
323 4877 and harmine, but not GNF-9228 or GNF-1346 (**Figs 6A and 6B**). Consistent with these  
324 findings, the robust proliferative effect of GNF-9228 in rat islets was not affected by co-  
325 treatment with cyclosporin A, a potent NFAT pathway inhibitor (**S3 Fig**). Also indicative of a  
326 unique mechanism of action, GNF-9228 caused a significant 3.9-fold increase in VGF-luc  
327 activity relative to DMSO treatment (p < 0.005), whereas GNF-4877 failed to cause significant  
328 luc activation in this assay (**Fig 6C**).

329

330 **Figure 6. GNF-9228 and GNF-1346 signal by distinct mechanisms relative to Dyrk1a**  
331 **inhibitors.** **A.** Ins1 cells treated with an NFATc1-GFP adenovirus were treated with a range  
332 of doses of the Dyrk1a inhibitors GNF-4877 or harmine, GNF-9228, or GNF-1346 or DMSO  
333 for 2h. Following treatment, cells were fixed and imaged for GFP nuclear localization. Data is  
334 quantified as percent of cells with nuclear localization of GFP for n = 3 experiments. **B.**  
335 Representative images showing subcellular localization of NFATc in the presence of 10  $\mu$ M  
336 GNF-4877, harmine, GNF-9228, GNF-1346, or DMSO; **C.** 832/13 cells were transiently  
337 transfected with the VGF-luc plasmid used to generate 832/13-VGF-luc cells and treated with  
338 10  $\mu$ M GNF-9228, 5  $\mu$ M GNF-4877, or 5  $\mu$ M forskolin for 24 h followed by measurement of  
339 luc-generated luminescence. Data are expressed as fold-change relative to DMSO-treated  
340 cells in four independent experiments ( $\#$  p < 0.005).

341

342 We also compared the proliferative effects of 10  $\mu$ M GNF-9228 to those of 5  $\mu$ M GNF-4877, a  
343 concentration reported as maximally active for islet cell proliferation [4]. In these experiments  
344 (**Figure 7**) human islets were exposed to EdU for 72 hours, in contrast to the studies in Figure  
345 3 where EdU was provided for 18 hours. All 6 human islet preps responded to GNF-9228 or  
346 GNF-9228 + GNF-4877 with an increase in EdU incorporation into total islet cells and  $\beta$ -cells,  
347 with statistically significant average responses of approximately 10-fold to both treatment  
348 conditions (**Fig 7 and S3 Table**). GNF-4877 also increased EdU incorporation into  $\beta$ -cells in  
349 all 6 human islet preps, with an average increase of 4-fold ( $p = 0.06$ ). (**Fig 7**). Combining the  
350 two compounds had no additive effect on total cell or  $\beta$ -cell proliferation. GNF-9228 or GNF-  
351 9228 + GNF-4877 also caused an average, statistically significant 5-fold increase in  $\alpha$ -cell  
352 EdU incorporation in 5 separate human islet aliquots (**Fig 7 and S3 Table**). GNF-4877 alone  
353 also increased  $\alpha$ -cell EdU incorporation in all 5 preps surveyed, with an average 3-fold  
354 increase ( $p = 0.06$ ). We also measured EdU incorporation into  $\delta$ -cells in human islet preps  
355 treated with EdU for 72 hours and again found no consistent effect of GNF-9228 (**S1 Table**).  
356 Thus, with longer duration of EdU exposure, we find that GNF-9228 increases both  $\beta$ -cell and  
357  $\alpha$ -cell but not  $\delta$ -cell replication, with a preferential effect on  $\beta$ -cells.

358

359 **Fig 7. Comparison of effects of GNF-9228 and the Dyrk1a inhibitor GNF-4877 on human**  
360 **islet cell proliferation.** Intact human islets were cultured for 72h in the presence of 10  $\mu$ M  
361 GNF-9228, 5  $\mu$ M GNF-4877, a combination of both, or DMSO (vehicle control). EdU was  
362 added for the last 72 h of culture. Islets were dispersed, stained for EdU incorporation and  
363 treated with antibodies against insulin or glucagon, and immunofluorescent signals assayed  
364 with a Thermo Scientific Celloomics CX5- High Content (HC) cell imaging system. Data are  
365 expressed as the fold-increase in total EdU positive cells (left),  $\beta$ -cells (EdU and insulin co-  
366 positive cells) (center), and  $\alpha$ -cells (EdU and glucagon positive cells) (right), representing

367 experiments performed on 6 independent human islet aliquots (total cells and  $\beta$ -cells) and 5  
368 human islet samples ( $\alpha$ -cells), expressed as mean  $\pm$  S.E.M. (\*  $p < 0.05$ , #  $p < 0.005$  relative to  
369 DMSO control). See S3 Table for more details.

370

371 **Compounds GNF-9228, GNF-1346, and GNF-4088 have poor *in vivo* pharmacodynamic**  
372 **properties.** To test the effects of our compounds in the *in vivo* setting, we first injected 30  
373 mg/kg of GNF-9228 suspended in DMSO into normal C57BL6 mice and measured its blood  
374 levels over the following 24 hours. Although high levels of GNF-9228 were detected at the  
375 earliest time points ( $C_{max} = 8493$  nM), the compound was cleared rapidly, with levels falling  
376 to 853 nM at 1 hour post-injection (half life = 8 minutes; **S4 Fig**). The pharmacokinetic  
377 properties of GNF-1346 and GNF-4088 were even less encouraging. Nevertheless, we  
378 performed a study in which GNF-9228 was injected into C57BL6 mice daily at a dose of 30  
379 mg/kg for one week, with mice receiving BrdU in the drinking water at a concentration of 0.8  
380 mg/ml throughout the study. GNF-9228 treatment caused no increase in BrdU incorporation  
381 into mouse islet cells compared to DMSO-treated mice, likely due to its rapid clearance.



383 **Discussion**

384

385 Both major forms of diabetes involve loss of functional  $\beta$ -cell mass. In type 1 diabetes (T1D),  
386 islet  $\beta$ -cells are destroyed by an autoimmune mechanism, whereas in type 2 diabetes (T2D),  
387 the decline in  $\beta$ -cell mass and function is mediated by metabolic fuel overload and  
388 inflammatory pathways [19]. Thus, for both T1D and T2D, strategies for regeneration of  
389 functional  $\beta$ -cell mass should ideally address all of the contributory elements of  $\beta$ -cell failure,  
390 including susceptibility to cytotoxic agents, loss of proliferative capacity, and impairment of  
391 insulin secretion. In addition, the strategy chosen should target regeneration of islet  $\beta$ -cells  
392 specifically, or at least selectively, with minimal activity against other islet or peripheral cells.  
393 In light of these challenges, it is not surprising that no  $\beta$ -cell regenerative drugs currently exist  
394 for humans with diabetes.

395

396 The current study was built upon work showing that overexpression of the homeobox  
397 transcription factor Nkx6.1 stimulates islet  $\beta$ -cell replication in a selective fashion, while also  
398 enhancing GSIS [7-12]. VGF is a gene that is robustly induced by Nkx6.1 overexpression,  
399 and subsequent studies demonstrated several salutary effects of the VGF prohormone and its  
400 encoded peptides such as TLQP-21 on  $\beta$ -cell survival and function [9,12]. Based on these  
401 findings, we designed a cell-based screening strategy involving stable transfection of 832/13  
402 cells with a VGF promoter-luciferase reporter gene. The screen yielded three compounds  
403 representing two chemotypes (Fig 2) with a robust capacity to stimulate human islet cell  
404 replication.

405



406 The most potent of these compounds, GNF-9228, has a remarkable combination of  
407 properties. First, it selectively activates human  $\beta$ -cell EdU incorporation, with a lesser effect  
408 on  $\alpha$ -cell replication and no effect on  $\delta$ -cells. Second, pre-exposure of human islets to GNF-  
409 9228 enhances insulin secretion at stimulatory glucose levels (16.7 mM). Third, pre-treatment  
410 of 832/13 rat insulinoma cells with GNF-9228 is cytoprotective against the ER stress-inducing  
411 agent thapsigargin or a mixture of the cytotoxic cytokines IL-1 $\beta$  +  $\gamma$ -IFN. We recognize that  
412 the compound is not entirely  $\beta$ -cell specific, with a lesser, but significant effect to stimulate  $\alpha$ -  
413 cell replication (Figure 7). We also acknowledge that the compound tends to increase insulin  
414 secretion at basal glucose levels, an effect that if mimicked in the *in vivo* setting could result in  
415 increased risk for hypoglycemia. Further evaluation of these potential shortcomings will  
416 require development of GNF-9228 analogs with improved *in vivo* pharmacodynamics.

417

418 In addition to our work on Nkx6.1 and Pdx-1 as upstream inducers of islet cell proliferation [7-  
419 13], other signaling pathways that have been identified with potential for activating human  $\beta$ -  
420 cell proliferation include the PDGF pathway [21], signaling by TGF- $\beta$  family members  
421 [13,20,22], and glucose-regulated activation of proliferation mediated by ChREBP and c-myc  
422 [17,23]. Pathways that regulate translocation of the NFAT transcription factor have also  
423 received attention stemming from early studies showing that conditional ablation of NFAT  
424 caused a reduction of  $\beta$ -cell mass in mouse models [24-26]. The tyrosine kinase Dyrk1A is a  
425 potent regulator of NFAT translocation [24]. Recently, Dyrk1A inhibitors with islet cell  
426 proliferative effects have emerged including harmine, identified in a small molecule screen for  
427 c-myc inducers [5], GNF-4788, synthesized as a derivative of an aminopyrazine scaffold  
428 previously shown to have proliferative activity [4, 27], and 5-IT, an adenosine kinase inhibitor  
429 that cross-reacts with Dyrk1a [6]. All of these agents cause substantial increases in human  $\beta$ -

430 cell proliferation, with either no impairment of function [4,5], or an actual increase in GSIS with  
431 prolonged (12 days) treatment [6].

432

433 While these results provide encouragement for further investigation of Dyrk1a inhibitors for  
434 diabetes therapy, concerns about their ultimate practical utility include: 1) When added to  
435 human islets, harmine caused a significant increase in proliferation of non- $\beta$ -cells, including  $\alpha$ -  
436 cells,  $\delta$ -cells and ductal cells [5]. This coupled with the broad expression of Dyrk1a suggests  
437 that unwanted proliferative responses might occur in peripheral tissues in response to  
438 systemic administration of Dyrk1a inhibitors; 2) Harmine activates c-myc, explaining at least a  
439 portion of its replicative activity [5], GNF-4788 inhibits the Dyrk1a-related kinase GSK- $\beta$  [4],  
440 and 5-IT was originally isolated as an adenosine kinase inhibitor [6], suggesting possible off-  
441 target effects of these agents; 3) Overexpression of c-myc has independent effects on human  
442 islet cell proliferation [17], but also appears to drive islet de-differentiation and impairment of  
443 GSIS [28]; 4) In contrast to our work with GNF-9228, none of the studies on Dyrk1a inhibitors  
444 report a cytoprotective effect.

445

446 Importantly, our studies suggest that GNF-9228 activates signaling pathways distinct from  
447 those used by Dyrk1a inhibitors. Unlike GNF-4788 and harmine, GNF-9228 does not induce  
448 nuclear translocation of an NFAT-GFP fusion gene. Moreover, the proliferative effects of  
449 GNF-9228 are not blocked by NFAT translocation inhibitors such as cyclosporin A, and GNF-  
450 9228 but not GNF-4788 activates the VGF-luc reporter in 832/13-VGF-luc cells. However,  
451 GNF-9228 and GNF-4788 have no additive effects on human islet cell proliferation, possibly  
452 suggesting some mechanistic commonality of these agents that remains to be defined.

453

454 Although we have identified differences in GNF-9228 and Dyrk1a inhibitor cell signaling, we  
455 have not yet defined the mechanism(s) of action of GNF-9228. In human islets, a dose of  
456 GNF-9228 (10  $\mu$ M) that activates  $\beta$ -cell proliferation and GSIS causes a non-significant trend  
457 for increase of Nkx6.1 mRNA and has no effect on VGF or c-myc mRNA. This suggests that  
458 Nkx6.1 does not mediate the replicative effect of GNF-9228, and VGF is unlikely to explain its  
459 effects on insulin secretion and cell survival. Further studies will be required to discern the  
460 mechanism(s) of action of GNF-9228.

461

462 In sum, we report the identification of a small molecule that stimulates human  $\beta$ -cell  
463 proliferation, enhances insulin secretion, and protects against cytotoxic agents. An obvious  
464 next step is to test the impact of GNF-9228 on islet cell proliferation, function, and survival *in*  
465 *vivo*, but unfortunately all three of the compounds that emerged from our screen have poor  
466 pharmacodynamic properties. Our current focus is on development of chemically modified  
467 versions of GNF-9228 with enhanced bioavailability to allow *in vivo* testing. Further studies  
468 are also required to understand its mechanism(s) of action.

469

471 **Acknowledgements**

472

473 These studies were supported by a grant from the Juvenile Diabetes Research Foundation, 1-  
474 SRA-2017-356. The authors thank Drs. Patricia Kilian and Andrew Rakeman for helpful  
475 discussion and suggestions, and Lisa Poppe and Danhong Lu for excellent technical  
476 assistance. We also thank the Integrated Islet Distribution Program and Dr. Patrick  
477 MacDonald and the University of Alberta Islet Core Laboratory for provision of human islets for  
478 our studies.

479

480 **Conflicts of Interest.** BT, BL, and PM were employees of the Genomics Institute of the  
481 Norvartis Foundation in La Jolla during the performance of these studies. The work was  
482 funded by the JDRF via a joint grant to Duke (CBN and HEH) and the GNF team.

483

485 **References**

486

487 1) Beattie GM, Itkin-Ansari P, Cirulli V, Leibowitz G, Lopez AD, Bossie S, et al. Sustained  
488 proliferation of PDX-1+ cells derived from human islets. *Diabetes* 1999; 48(5): 1013-1019.

489 2) Fiaschi-Taesch NM, Bigatel TA, Sicari B, Takane KK, Salim F, Velazquez-Garcia S, et al.  
490 Survey of the human pancreatic beta-cell G1/S proteome reveals a potential therapeutic role  
491 for cdk-6 and cyclin D1 in enhancing human beta-cell replication and function in vivo. *Diabetes*  
492 2009; 58(4):882-893.

493 3) Fiaschi-Taesch NM, Salim F, Kleinberger J, Troxell R, Cozar-Castellano I, Selk K, et al.  
494 Induction of human beta-cell proliferation and engraftment using a single G1/S regulatory  
495 molecule, cdk6. *Diabetes* 2010; 59(8):1926-1936.

496 4) Shen W, Taylor B, Jin Q, Nguyen-Tran V, Meeusen S, Zhang YQ, et al. Inhibition of  
497 DYRK1A and GSK3B induces human  $\beta$ -cell proliferation. *Nature Comm* 2015; 6: 8372.

498 5) Wang P, Alvarez-Perez JC, Felsenfeld DP, Liu H, Sivendran S, Bender A, et al. A high-  
499 throughput chemical screen reveals that harmine-mediated inhibition of DYRK1A increases  
500 human pancreatic beta cell replication. *Nature Medicine* 2015; 21(4): 383-388.

501 6) Dirice E, Walpita D, Vetere A, Meier BC, Kahraman S, Hu J, et al. Inhibition of DYRK1A  
502 stimulates human  $\beta$ -cell proliferation. *Diabetes* 2016; 65(6): 1660-1671.

503 7) Schisler JC, Jensen PB, Taylor DG, Becker TC, Knop F, Lu D, et al. The Nkx 6.1  
504 homeodomain transcription factor suppresses glucagon expression and regulates glucose-  
505 stimulated insulin secretion in islet  $\beta$ -cells. *Proc Natl Acad Sci USA* 2005; 102(20): 7297-7302.

506 8) Schisler JC, Fueger PT, Babu DA, Hohmeier HE, Tessem JS, Lu D, et al. Stimulation of  
507 human and rat islet beta-cell proliferation with retention of function by the homeodomain  
508 transcription factor Nkx6.1. *Mol Cell Biol* 2008; 28(10): 3465-3476.

509

- 510 9) Stephens SB, Schisler JC, Hohmeier HE, An J, Sun AY, Pitt GS, Newgard CB A VGF-  
511 derived peptide attenuates development of type 2 diabetes via enhancement of islet beta-cell  
512 survival and function. *Cell Metab* 2012; 16(1): 33-43
- 513 10) Tessem JS, Moss LG, Chao LC, Arlotto M, Lu D, Jensen MV, et al. Nkx6.1 regulates islet  
514  $\beta$ -cell proliferation via Nr4a1 and Nr4a3 nuclear receptors. *Proc Natl Acad Sci USA* 2014;  
515 111(14): 5242-5247.
- 516 11) Hayes HL, Moss LG, Schisler JC, Zhang Z, Rosenberg PB, Newgard, CB, Hohmeier HE.  
517 Pdx-1 activates islet  $\beta$ - and  $\alpha$ -cell proliferation via a TRPC3/6- and ERK1/2-regulated  
518 mechanism. *Mol Cell Biol* 2013; 33(20): 4017-4029.
- 519 12) Stephens SB, Edwards RJ, Sadahiro M, Lin W-J, Jiang C, Salton SR, Newgard CB. Loss  
520 of the prohormone VGF diminishes  $\beta$ -cell function via reduced insulin secretory granule  
521 biogenesis. *Cell Reports* 2017; 20(10): 2480-2489.
- 522 13) Hayes HL, Zhang L, Becker TC, Haldeman JM, Stephens SB, Arlotto M, et al. A Pdx-1-  
523 regulated soluble factor activates rat and human islet cell proliferation. *Mol Cell Biol* 2016;  
524 36(23): 2918-2930.
- 525 14) Hohmeier H, Mulder H, Chen G, Henkel-Reiger R, Prentki M, Newgard CB. Isolation of  
526 INS-1-Derived Cell Lines with Robust  $K_{ATP}$  Channel-Dependent and  $-$ Independent Glucose-  
527 Stimulated Insulin Secretion. *Diabetes* 2000; 49(3): 424-430.
- 528 15) Laffitte BA, Joseph SB, Chen M, Castrillo A, Repa J, Wilpitz D, et al. The phospholipid  
529 transfer protein gene is a liver X receptor expressed by macrophages in atherosclerotic  
530 lesions. *Mol Cell Biol* 2003; 23(6): 2182-2191.
- 531 16) Hayes HL, Peterson BS, Newgard CB, Hohmeier HE, Stephens SB. Apoptosis allows islet beta-  
532 cells to implement an autophagic mechanism to promote cell survival. *PLoS One* 2016; 12: e0172567.
- 533 17) Canu N, Possenti R, Rinaldi AM, Trani E, Levi A. Molecular cloning and characterization of the  
534 human VGF promoter region. *J Neurochem* 1997; 68(4): 1390-1399.

- 535 18) Karslioglu E, Kleinberger JW, Salim FG, Cox AE, Takane KK, Scott DK, Stewart AF. cMyc is a  
536 principal upstream driver of beta-cell proliferation in rat insulinoma cell lines and is an effective  
537 mediator of human beta-cell replication. *Mol Endocrinol* 2011; 25(10): 1760-1772.
- 538 19) Muoio DM, Newgard CB. Molecular and metabolic mechanisms of insulin resistance and  
539  $\beta$ -cell failure in type 2 diabetes. *Nature Rev Mol Cell Biol* 2008; 9(3): 193-205.
- 540 20) Karakose E, Ackeifi C, Wang P, Stewart AF. Advances in drug discovery for human beta  
541 cell regeneration. *Diabetologia* 2018; 61(8): 1693-1699.
- 542 21) Chen H, Gu X, Liu Y, Wang J, Wirt SE, Bottino R, et al. PDGF signaling controls age-dependent  
543 proliferation in pancreatic islet  $\beta$ -cells. *Nature* 2011; 478(7369): 349-355.
- 544 22) Dhawan S, Dirice E, Kulkarni RN, Bhushan A. Inhibition of TGF- $\beta$  signaling promotes human  
545 pancreatic  $\beta$ -cell replication. *Diabetes* 2016; 65(5): 1208-1218.
- 546 23) Metukuri MR, Zhang P, Basantani MK, Chin C, Stamateris RE, Alonso LC, et al. ChREBP  
547 mediates glucose-stimulated pancreatic  $\beta$ -cell proliferation. *Diabetes* 2012; 61(8): 2004-2015.
- 548 24) Arron JR, Winslow MM, Polleri A, Chang CP, Wu H, Gao X, et al. NFAT dysregulation by  
549 increased dosage of DSCR1 and DRYK1A on chromosome 21. *Nature* 2006; 441(7093): 595-600.
- 550 25) Goodyer WR, Gu X, Liu Y, Bottino R, Crabtree GR, Kim SK. Neonatal beta cell  
551 development in mice and humans is regulated by calcineurin/NFAT. *Developmental Cell* 2012;  
552 23(1): 21-34.
- 553 26) Heit JJ, Apelqvist AA, Gu X, Winslow MM, Neilson JR, Crabtree GR, Kim SK.  
554 Calcineurin/NFAT signaling regulates pancreatic beta-cell growth and function. *Nature* 2006;  
555 443(7109): 345-349.
- 556 27) Shen W, Tremblay MS, Deshmukh VA, Wang W, Filippi CM, Harb G, et al. Small-  
557 molecule inducer of beta cell proliferation identified by high-throughput screening. *J Am*  
558 *Chem Soc* 2013; 135(5): 1669-1672.

559 28) Puri S, Roy N, Russ HA, Leonhardt L, French EK, Roy R, et al. Replication confers  $\beta$ -cell  
560 immaturity. Nature Comm 2018; 9(1): 485.



# Figure 1

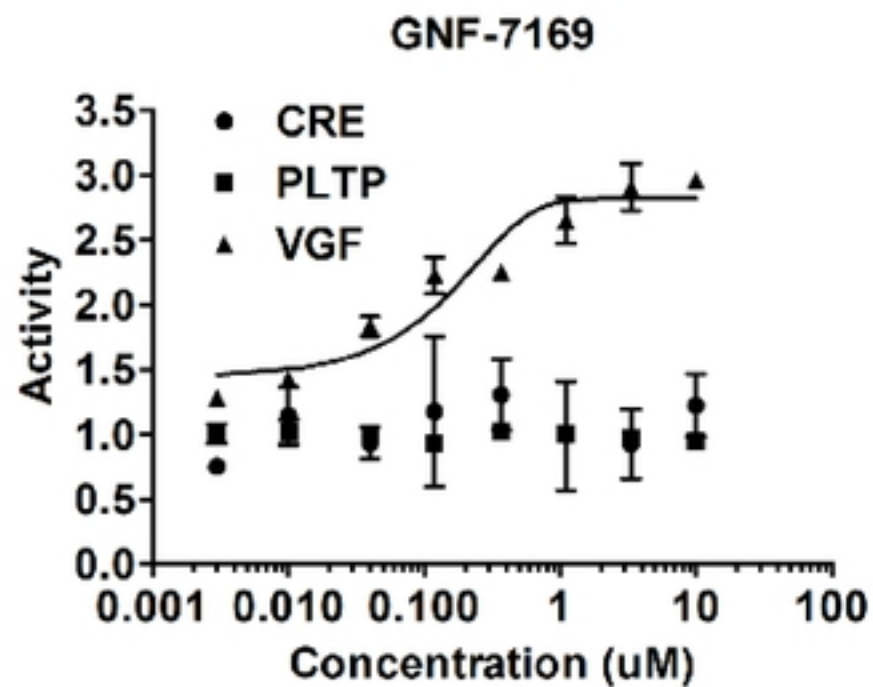

$EC_{50} = 0.11$   
98% efficacy

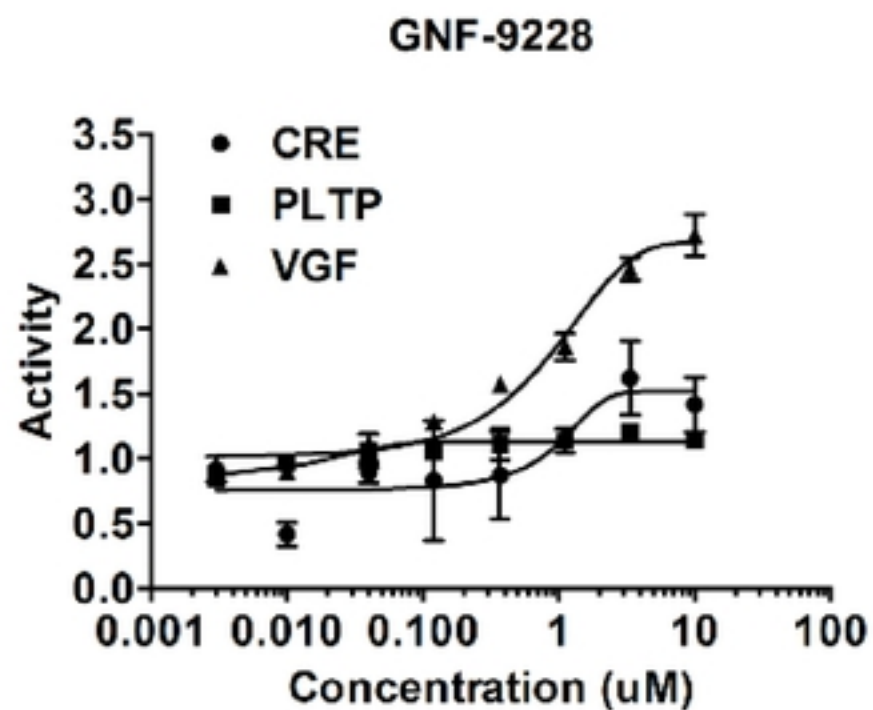

$EC_{50} = 1.43$   
94% efficacy

# Figure 2

A

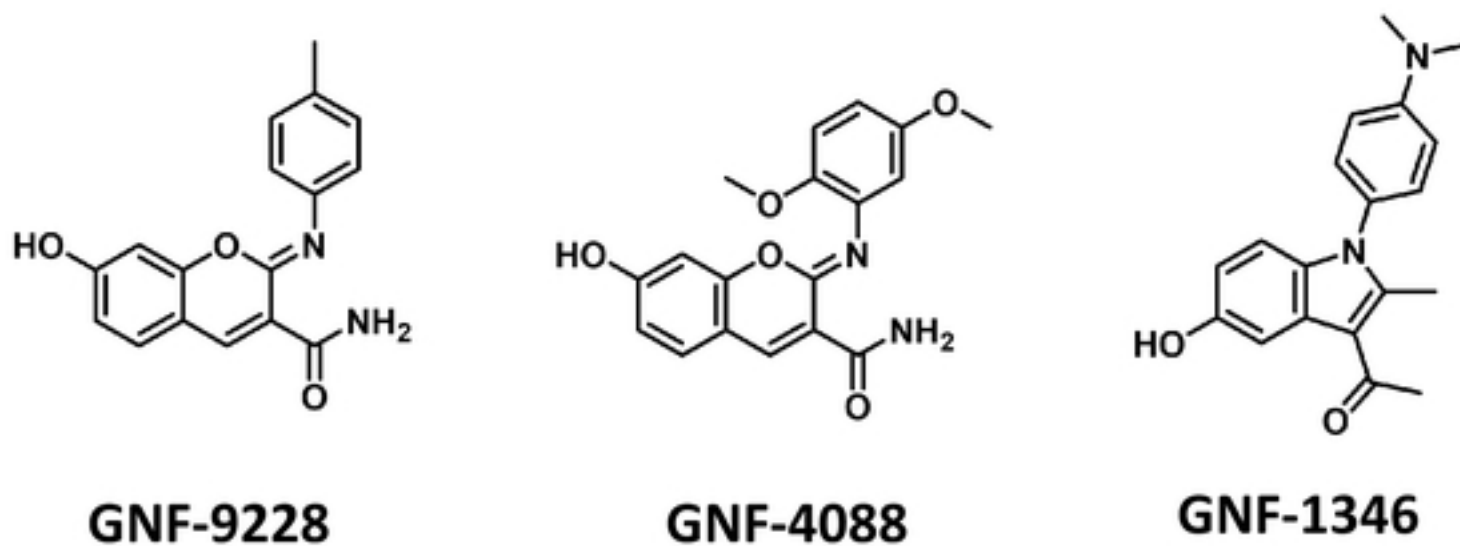

B

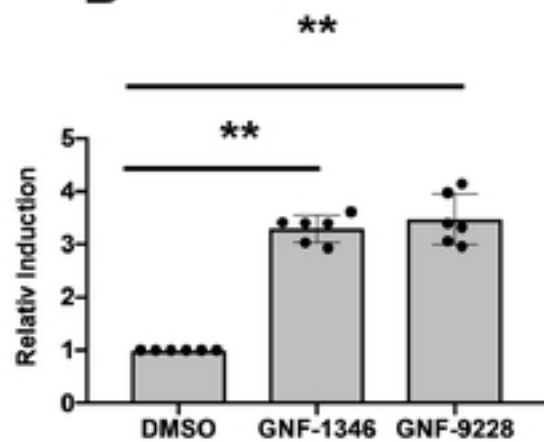

C

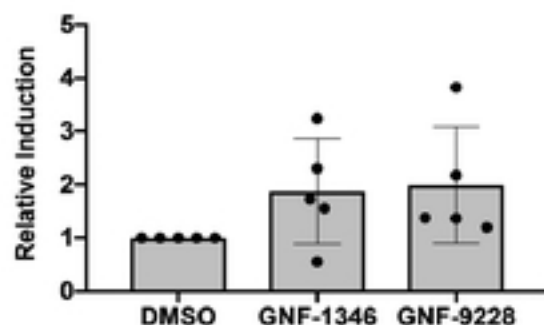

D

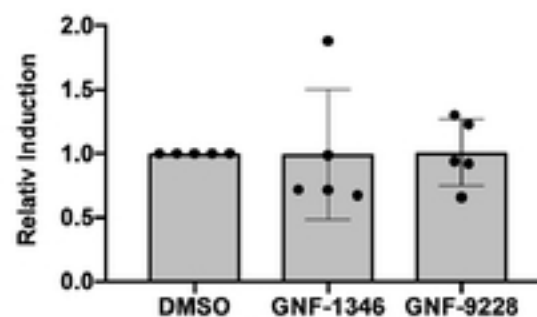

E

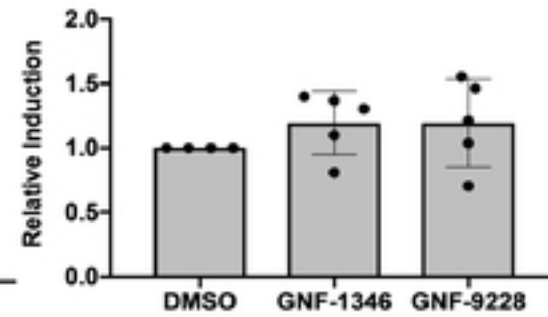

# Figure 3

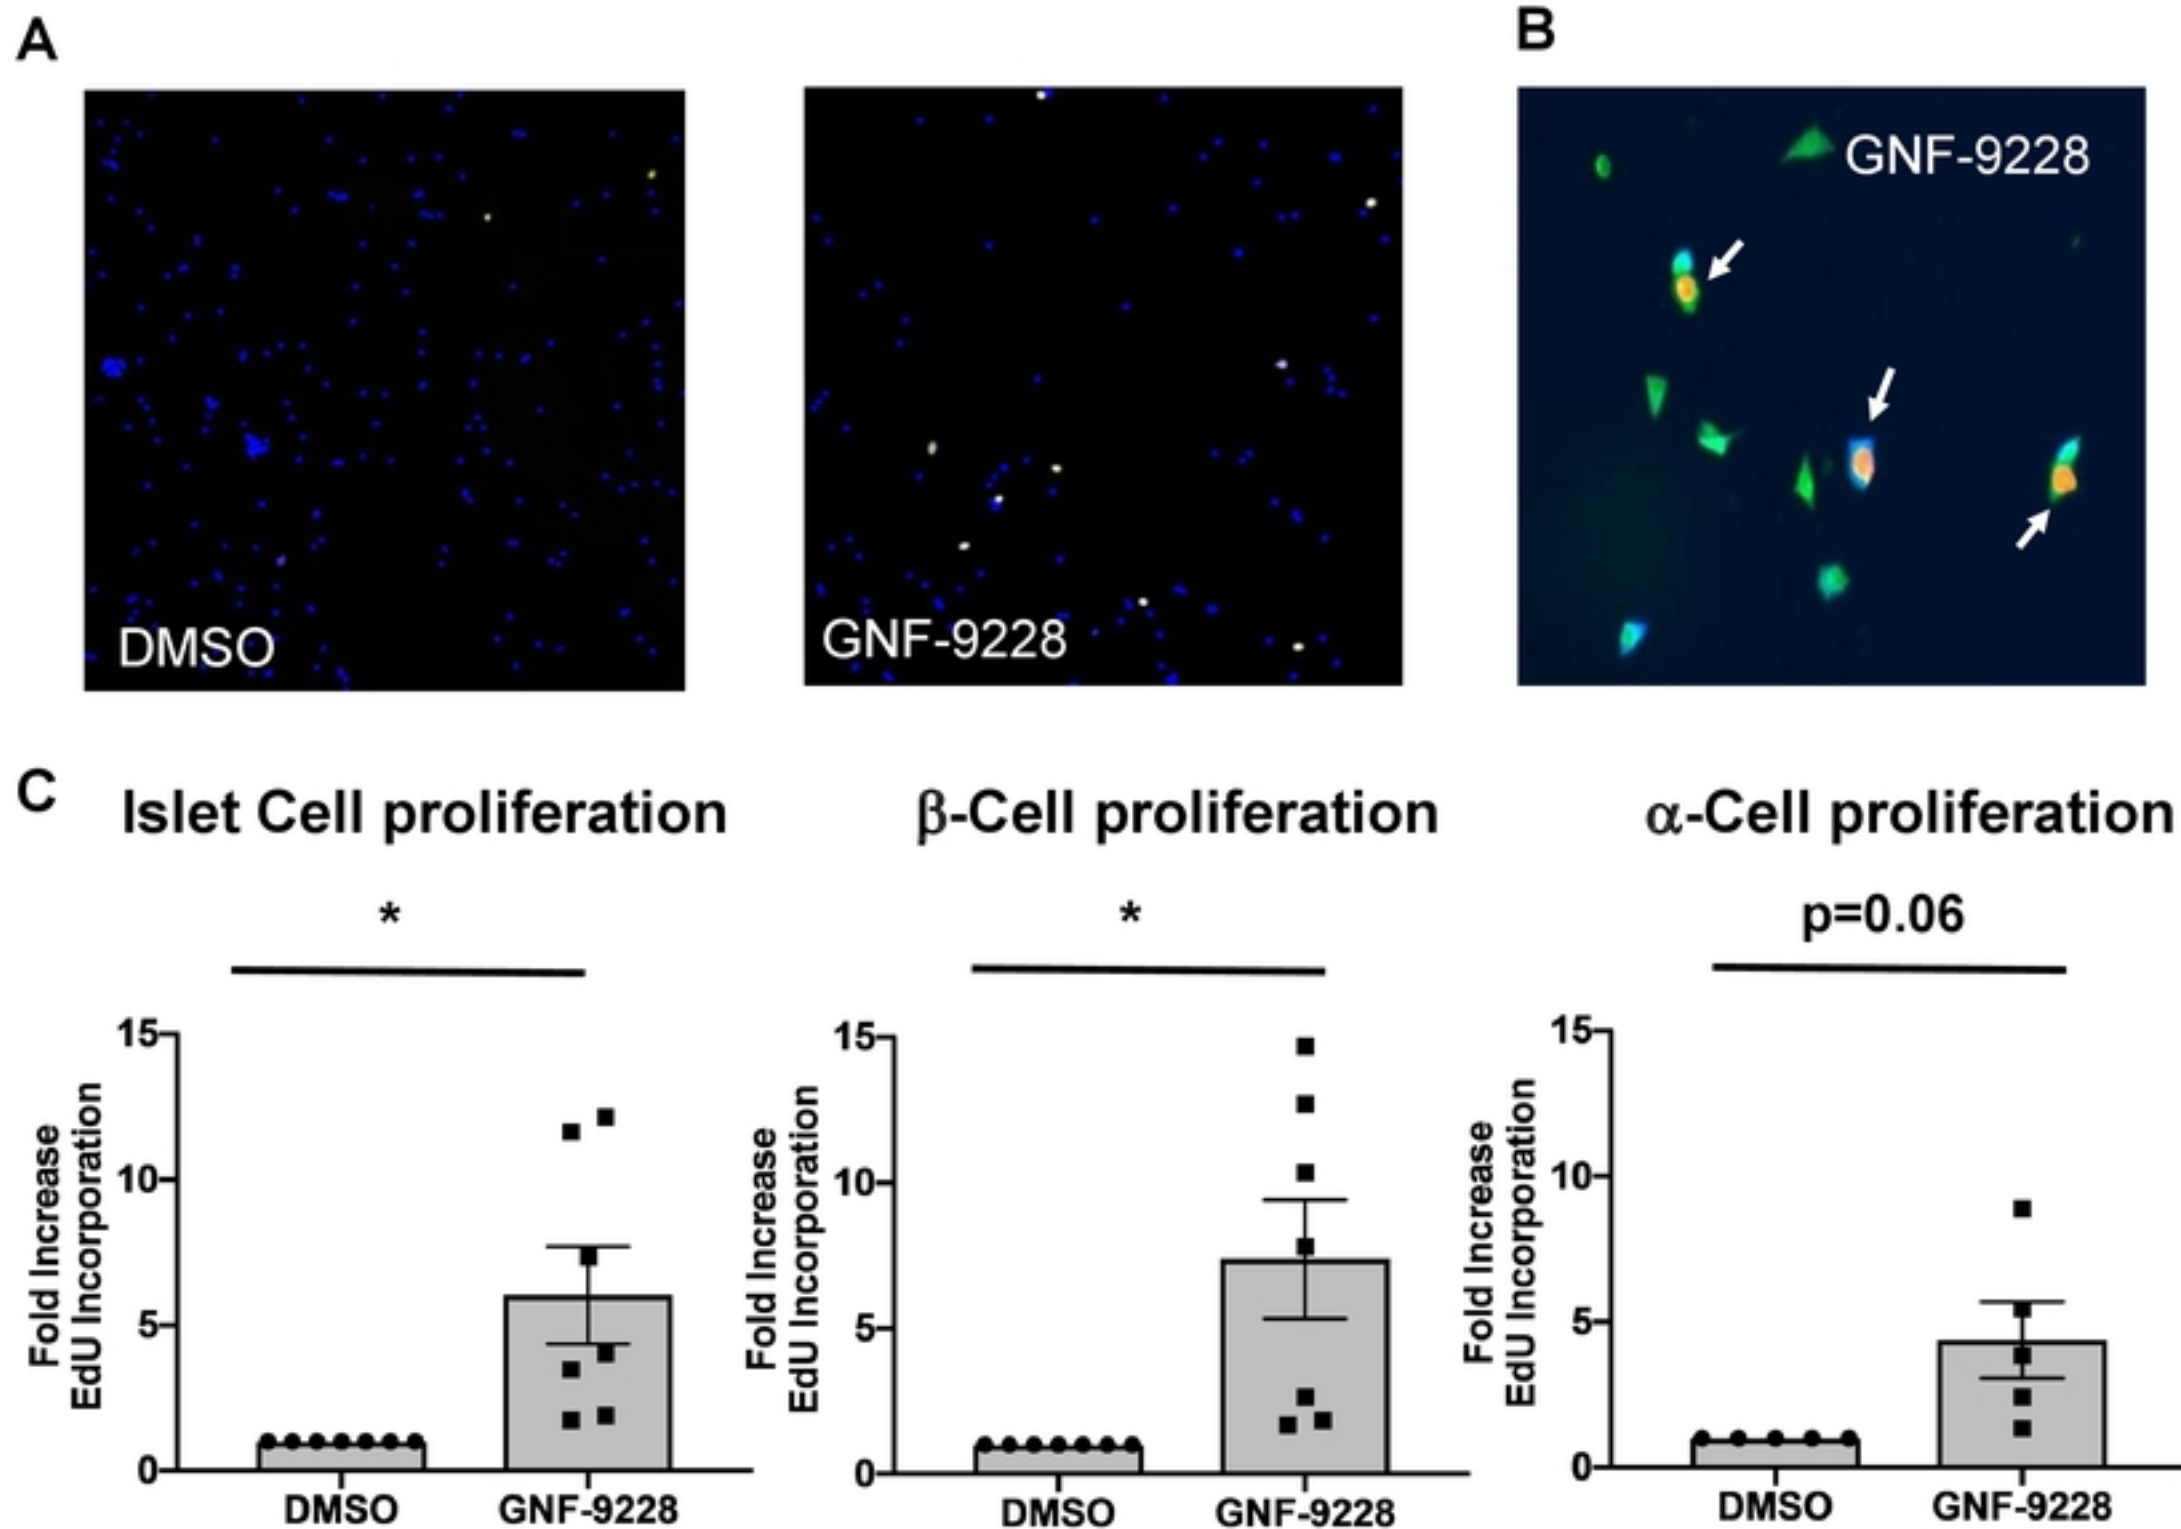

Figure 3

Figure 4

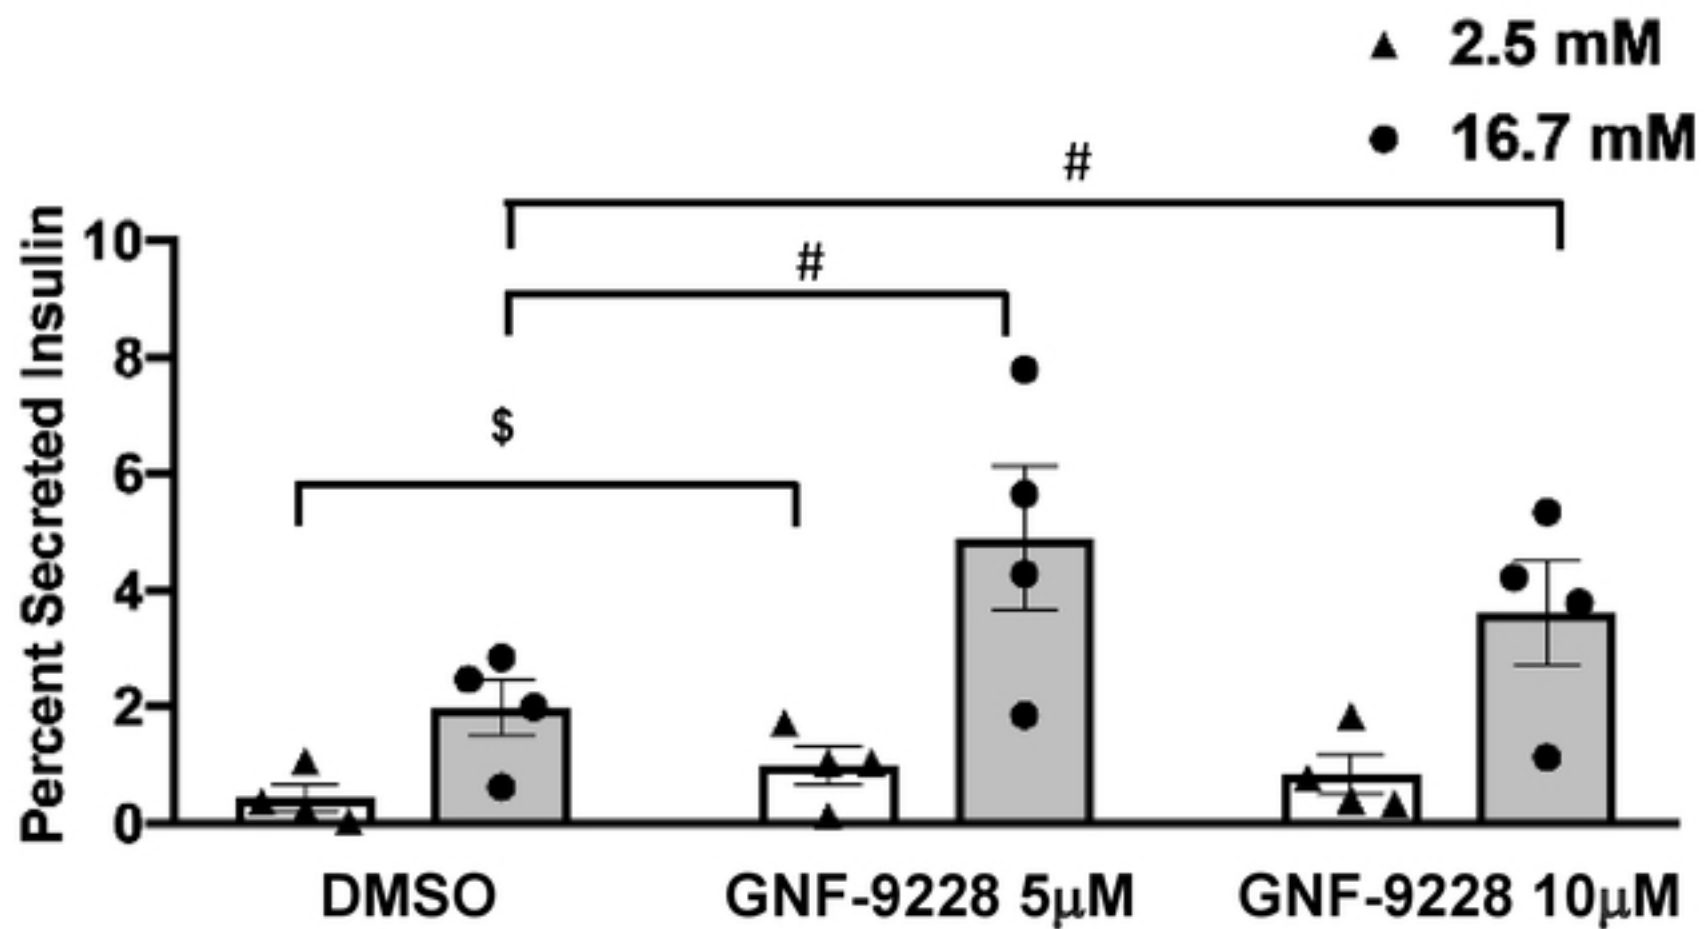

Figure 4

# Figure 5

A

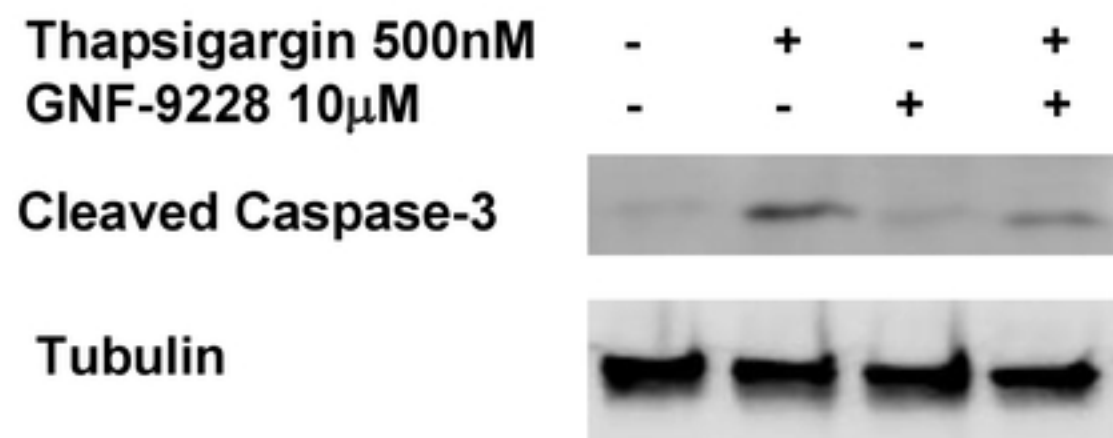

B

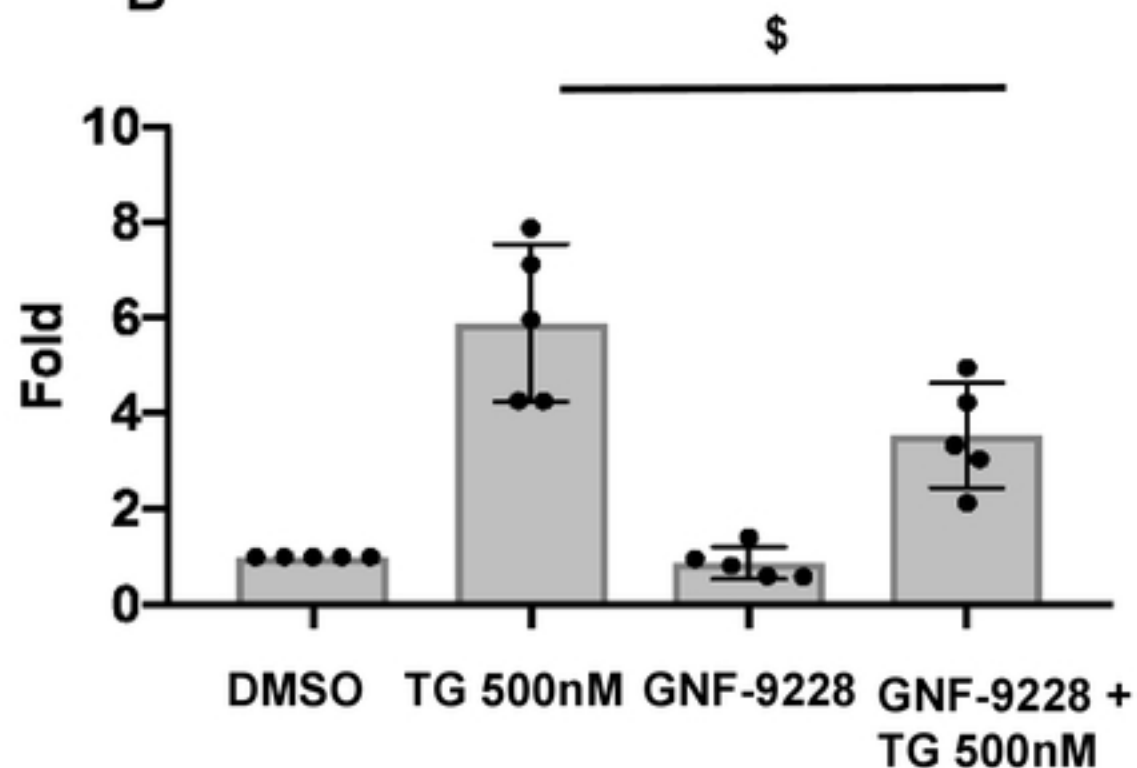

C

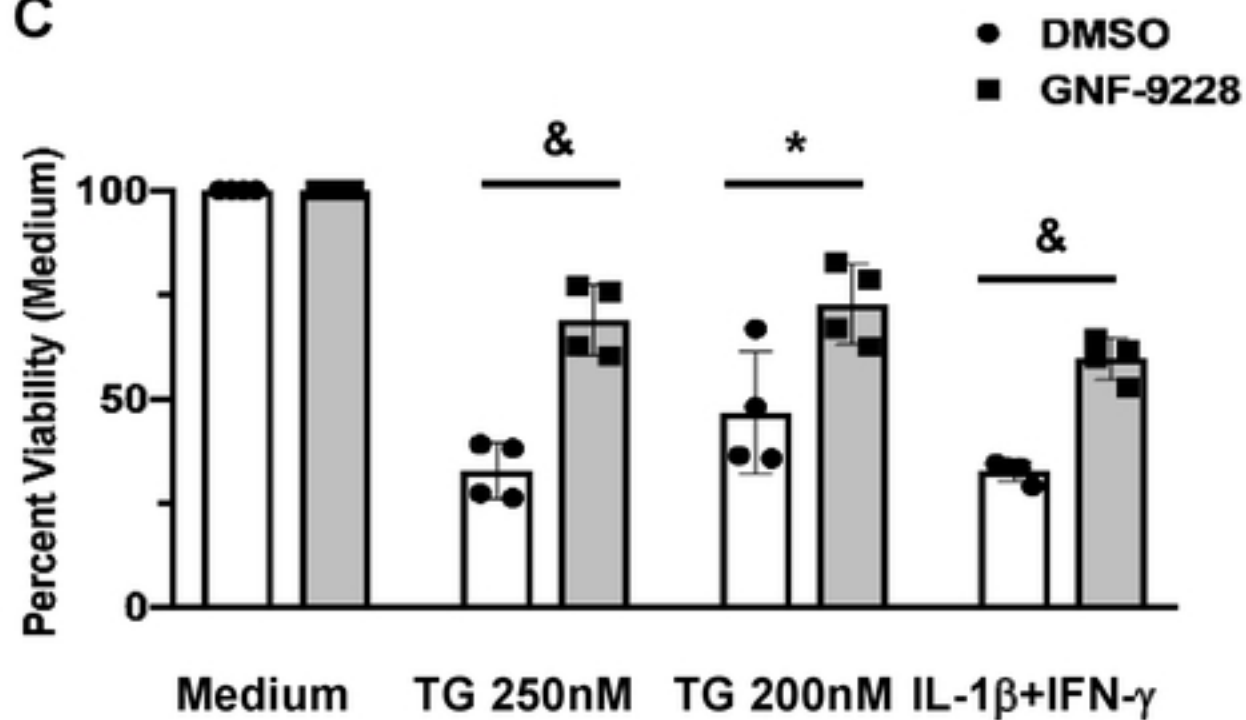

Figure 5

# Figure 6

A

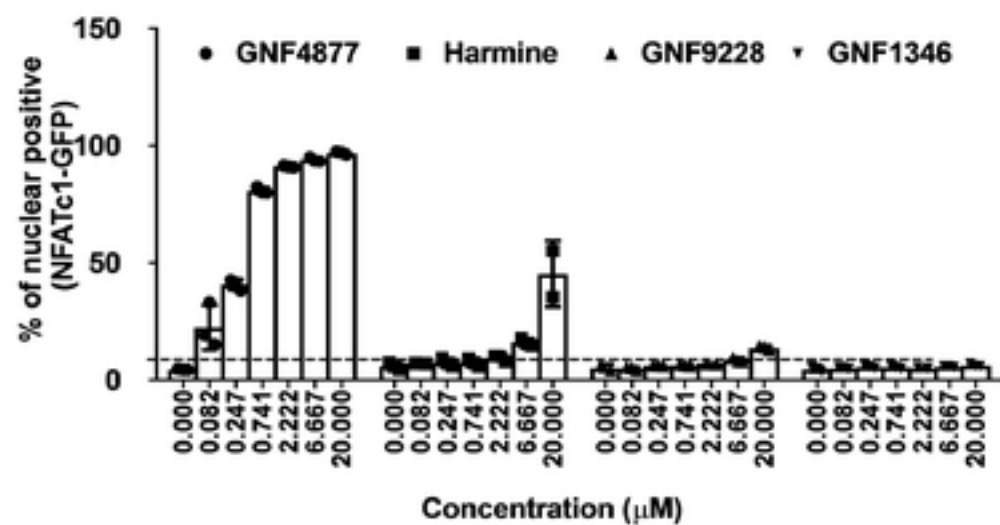

C

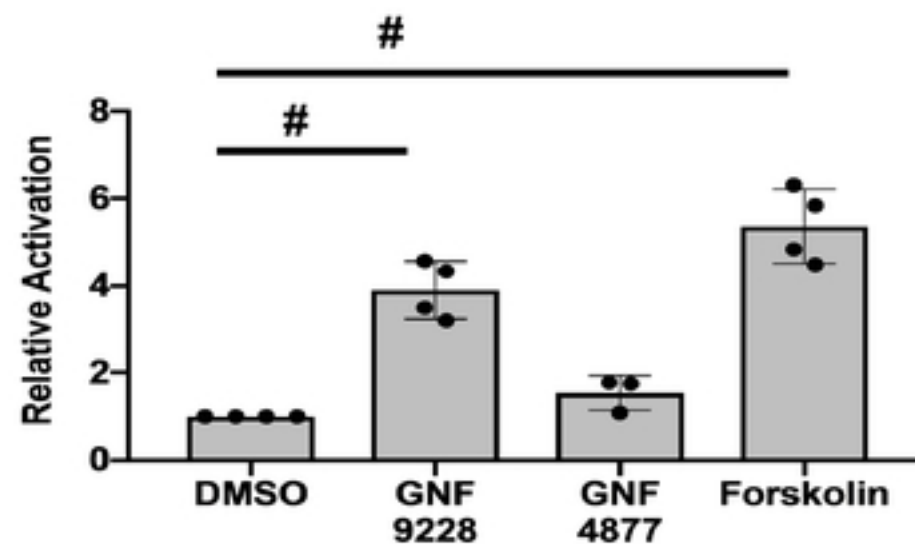

B

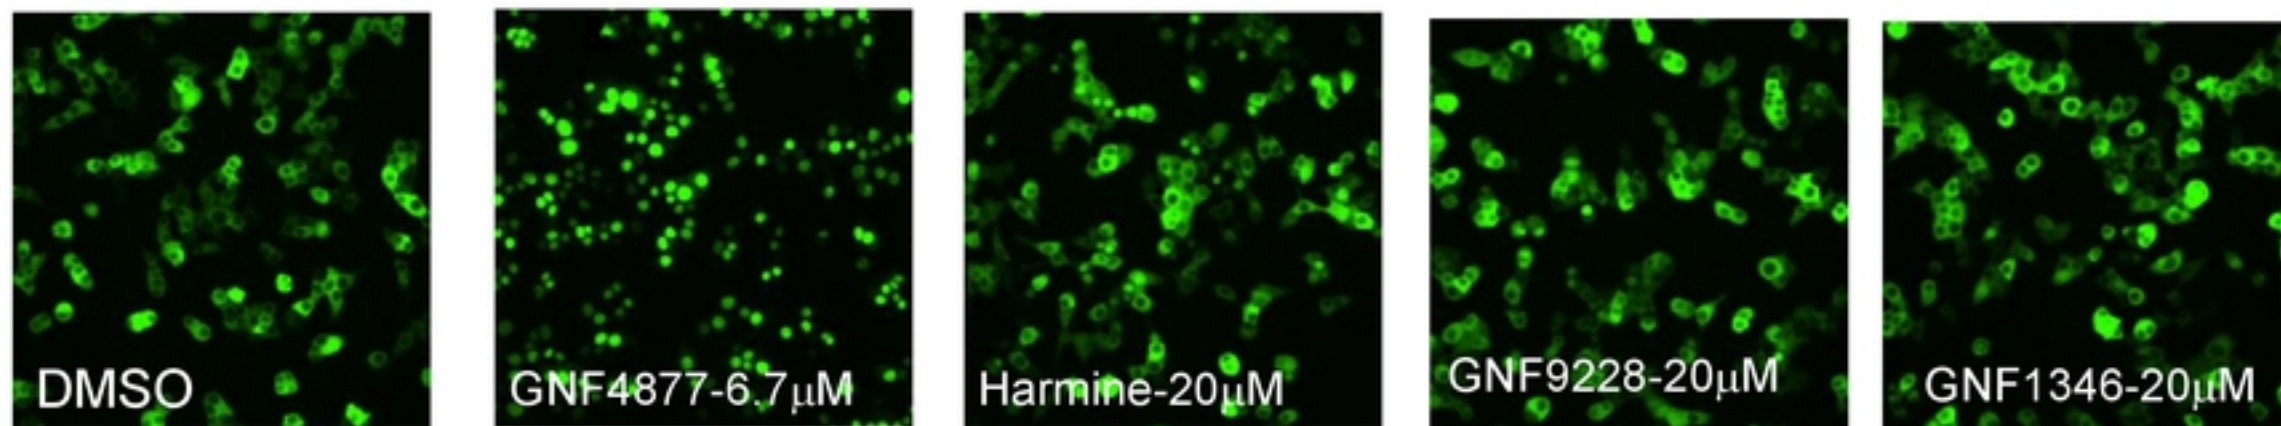

Figure 6

# Figure 7

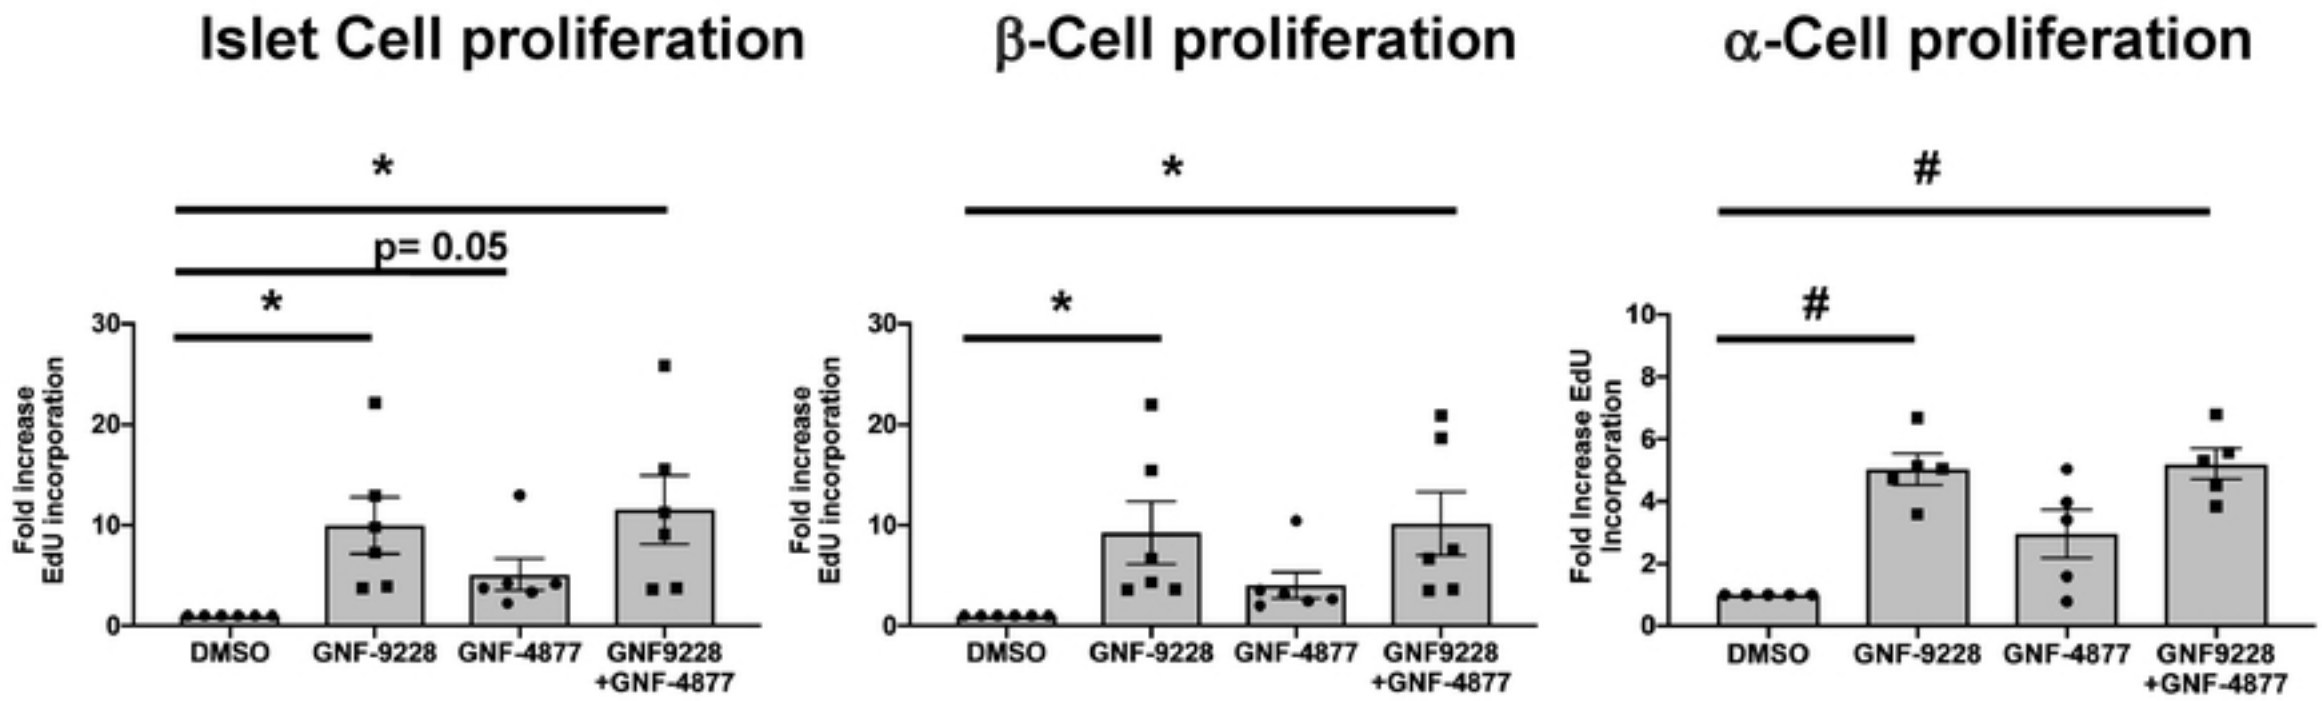

Figure 7
